# Supplementary material for: Which Properties Allow Ligands to Open and Bind to the Transient Binding Pocket of Human Aldose Reductase?
Source: MDPI journal article supplement (doi:10.3390/biom11121837), 2021-12-06
Supplement: s1 [file s1]

## Supporting Information

# Which Properties Features Ligands to Open and Bind to the Transient Binding Pocket of Human Aldose Reductase?

**Anna Sandner, Khang Ngo, Christoph P. Sager, Andreas Heine, and Gerhard Klebe\***

Institut für Pharmazeutische Chemie, Philipps-Universität Marburg, Marbacher Weg 6, 35037 Marburg, Germany; anna.sandner@uni-marburg.de (A.S.); khang.ngo@uni-marburg.de (K.N.); andreas.heine@staff.uni-marburg.de (A.H.)

\* Correspondence: gerhard.klebe@staff.uni-marburg.de; Tel.: +49-6421-28-21313

Received: date; Accepted: date; Published: date

## Table of Contents

|                                                                                                                                                        |   |
|--------------------------------------------------------------------------------------------------------------------------------------------------------|---|
| Figure S1: Examples of raw thermograms and integrated heat values for one of at least three direct ITC measurements of the inhibitors 3, 4 and 9.....  | 2 |
| Figure S2: Examples of raw thermograms and integrated heat values for one of at least three displacement ITC measurements of the inhibitors 5 – 6..... | 3 |
| Figure S3: Superposition of the crystal structures of ALR-2 • <b>1</b> obtained at pH 5 and 8 .....                                                    | 4 |
| Table S1 - S2: Crystallographic Tables.....                                                                                                            | 5 |
| Supplementary References.....                                                                                                                          | 7 |

## Supplementary Figures

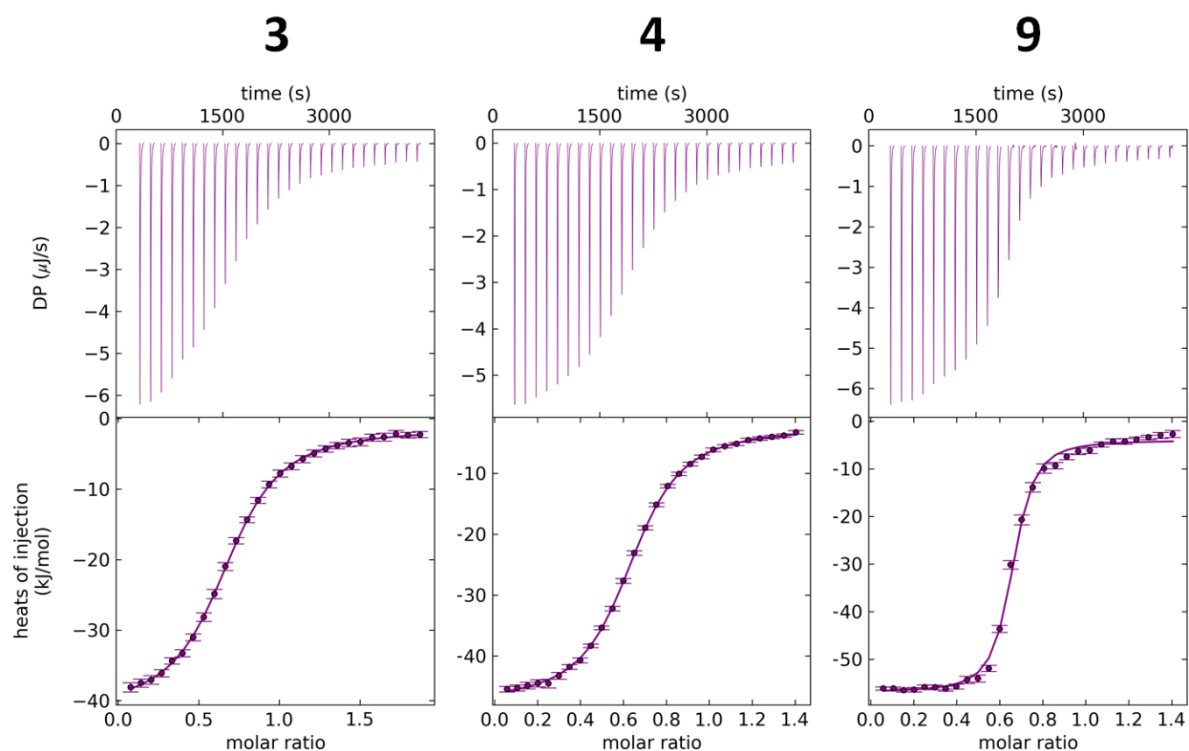

**Figure S1:** Examples of raw thermograms and integrated heat values for one of at least three direct ITC measurements of the inhibitors **3**, **4** and **9**. For the thermogram on the top the y-axis shows the differential power in  $\mu\text{J/s}$  and the x-axis the measuring time in s. The y-axis of the evaluated data below shows the heats of injections in  $\text{kJ/mol}$  and the x-axis the molar ratio.

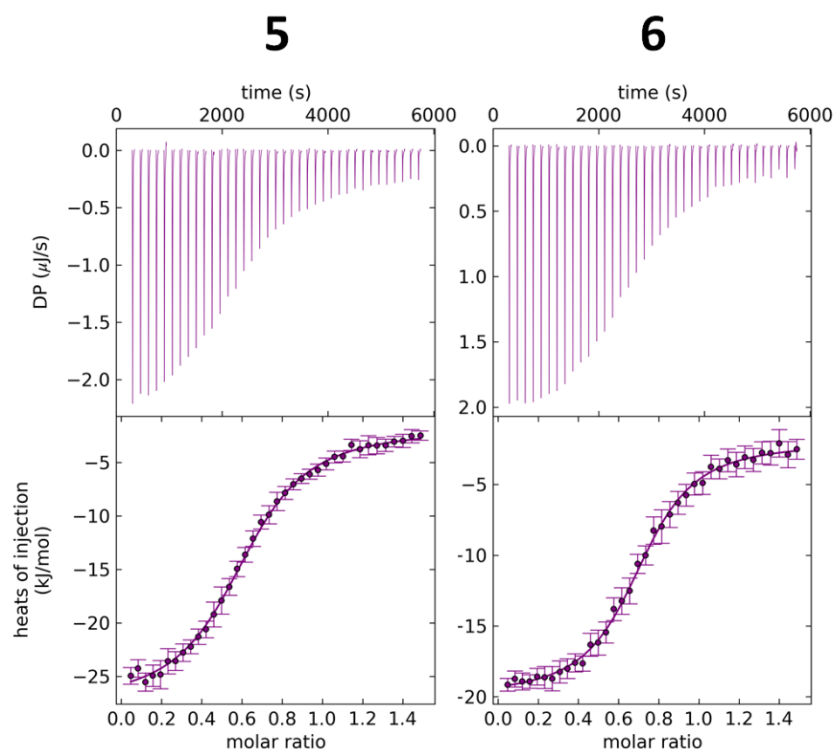

**Figure S2:** Examples of raw thermograms and integrated heat values for one of at least three displacement ITC measurements of the inhibitors **5** – **6**. For the thermogram on the top the y-axis shows the differential power in  $\mu\text{J/s}$  and the x-axis the measuring time in s. The y-axis of the evaluated data below shows the heats of injections in  $\text{kJ/mol}$  and the x-axis the molar ratio.

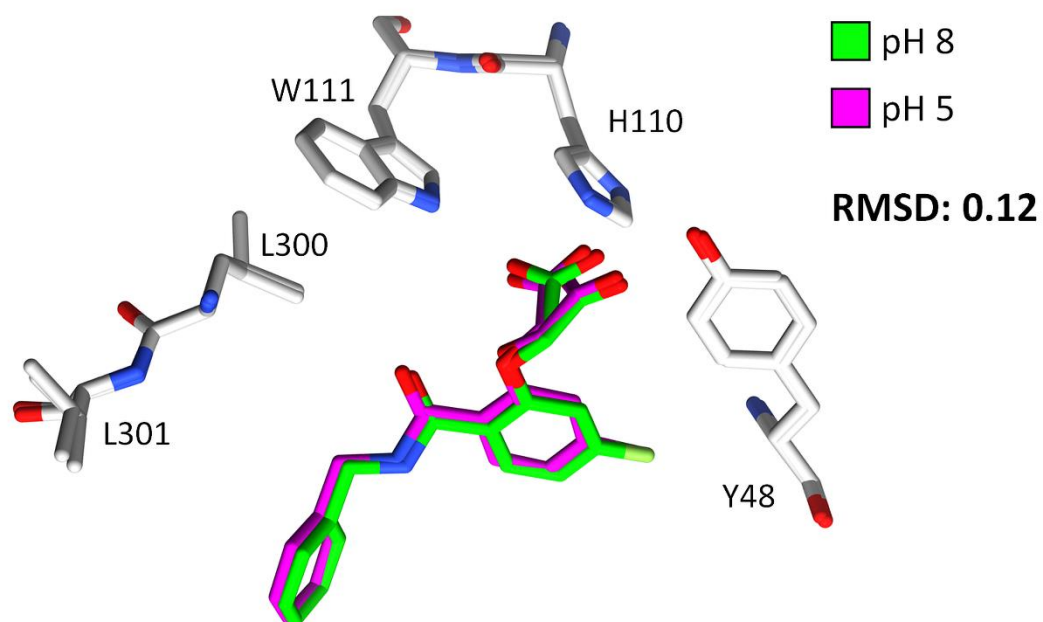

**Figure S3:** Superposition of the ligand geometries of **1** in the crystal structures with ALR-2 obtained by soaking at pH 5 (carbon atoms: magenta) and pH8 (carbon atoms: green). Selected residues of the active site are also shown (carbon atoms: white).

# Crystallographic Tables

**Table S1:** X-ray data collection and refinement statistics of inhibitors **3** – **5** in complex with ALR-2 wildtype.

|                                                         | <b>3</b> (6TUF)            | <b>4</b> (6TUC)            | <b>5</b> (not deposited)   |
|---------------------------------------------------------|----------------------------|----------------------------|----------------------------|
| <b>(A) Data collection and processing</b>               |                            |                            |                            |
| Beamline                                                | Bessy 14.2                 | Bessy 14.2                 | Bessy 14.1                 |
| Wavelength [Å]                                          | 0.9184                     | 0.9184                     | 0.9184                     |
| Space group                                             | P12 <sub>1</sub> 1         | P12 <sub>1</sub> 1         | P12 <sub>1</sub> 1         |
| Unit Cell parameters:                                   |                            |                            |                            |
| <i>a</i> , <i>b</i> , <i>c</i> [Å]                      | 47.2, 66.4, 49.2           | 47.2, 66.5, 49.2           | 47.3, 66.7, 49.4           |
| $\alpha$ , $\beta$ , $\gamma$ [°]                       | 90.0, 92.4, 90.0           | 90.0, 92.1, 90.0           | 90.0, 92.8, 90.0           |
| Matthews coef. [Å <sup>3</sup> ·Da <sup>-1</sup> ]      | 2.2                        | 2.1                        | 2.2                        |
| Solvent content [%]                                     | 43                         | 43                         | 43                         |
| <b>(B) Diffraction Data<sup>[a]</sup></b>               |                            |                            |                            |
| Resolution range [Å]                                    | 47.13 – 1.15 (1.22 – 1.15) | 49.19 – 1.06 (1.12 – 1.06) | 39.68 – 0.93 (0.99 – 0.93) |
| Unique reflections                                      | 105125 (16246)             | 132582 (20046)             | 198129 (28823)             |
| <i>R</i> ( <i>I</i> ) <sub>sym</sub> [%] <sup>[b]</sup> | 4.0 (50.7)                 | 7.6 (37.1)                 | 4.2 (30.6)                 |
| Completeness [%]                                        | 97.3 (93.3)                | 96.3 (90.3)                | 96.5 (87.0)                |
| Redundancy                                              | 3.7 (3.5)                  | 3.6 (3.4)                  | 3.4 (2.9)                  |
| <i>I</i> /σ ( <i>I</i> )                                | 19.2 (2.3)                 | 14.8 (3.6)                 | 15.0 (2.8)                 |
| <b>(C) Refinement</b>                                   |                            |                            |                            |
| Resolution range [Å]                                    | 34.83 – 1.15               | 49.24 – 1.06               | 38.61 – 0.93               |
| Reflections used in refinement                          |                            |                            |                            |
| work                                                    | 99878                      | 125952                     | 188222                     |
| free                                                    | 5257                       | 6630                       | 9907                       |
| Final R values                                          |                            |                            |                            |
| work [%] <sup>[c]</sup>                                 | 12.9                       | 12.6                       | 10.4                       |
| free [%] <sup>[d]</sup>                                 | 15.2                       | 14.3                       | 11.7                       |
| Number of protein residues                              | 316                        | 313                        | 316                        |
| NADP <sup>+</sup> atoms                                 | 48                         | 48                         | 48                         |
| Inhibitor atoms                                         | 40                         | 30                         | 17                         |
| Water molecules                                         | 375                        | 463                        | 454                        |
| Other inhibitor atoms                                   | 13                         | 13                         | 13                         |
| RMSD bonds                                              |                            |                            |                            |
| Bond length [Å]                                         | 0.006                      | 0.006                      | 0.006                      |
| Bond angles [°]                                         | 0.99                       | 1.00                       | 1.04                       |
| Ramachandran plot <sup>[e]</sup>                        |                            |                            |                            |
| favored regions [%]                                     | 91.0                       | 89.5                       | 91.4                       |
| additional allowed reg. [%]                             | 9.0                        | 10.5                       | 8.6                        |
| generously allowed reg. [%]                             | 0.0                        | 0.0                        | 0.0                        |
| Mean <i>B</i> -Factor [Å <sup>2</sup> ] <sup>[f]</sup>  |                            |                            |                            |
| Protein                                                 | 13.4                       | 8.8                        | 10.1                       |
| Inhibitor                                               | 18.1                       | 15.0                       | 23.3                       |
| Water molecules                                         | 25.9                       | 21.7                       | 24.0                       |
| NADP <sup>+</sup>                                       | 8.8                        | 4.7                        | 6.5                        |
| Other inhibitors                                        | 14.8                       | 8.2                        | 10.7                       |

[a] values in parenthesis are statistics for the highest resolution shell. [b]  $R(I)_{sym} = \frac{\sum |I - \langle I \rangle|}{\sum |I|} \cdot 100$  for which *I* = observed intensity and  $\langle I \rangle$  = statistically weighted average intensity of multiple observations. [c] Calculated by MOLEMAN.<sup>1</sup> [d]  $R_{free}$  = same definition as for  $R_{work}$  for a cross validation set of ≈ 5% of the reflections. [e] Calculated by PROCHECK.<sup>2</sup> [f]  $R_{work} = \frac{\sum |F_o - F_c|}{\sum |F_o|} \cdot 100$  for which *F*<sub>o</sub> = observed structure factor amplitudes and *F*<sub>c</sub> = calculated structure factor amplitudes.

**Table S2:** X-ray data collection and refinement statistics of inhibitor **6** in complex with ALR-2 wildtype

| 6 (6SYW)                                               |                            |
|--------------------------------------------------------|----------------------------|
| <b>(A) Data collection and processing</b>              |                            |
| Beamline                                               | Bessy 14.1                 |
| Wavelength [Å]                                         | 0.91841                    |
| Space group                                            | P12 <sub>1</sub> 1         |
| Unit Cell parameters:                                  |                            |
| <i>a</i> , <i>b</i> , <i>c</i> [Å]                     | 47.3, 66.9, 49.3           |
| $\alpha$ , $\beta$ , $\gamma$ [°]                      | 90.0, 92.0, 90.0           |
| Matthews coef. [Å <sup>3</sup> Da <sup>-1</sup> ]      | 2.2                        |
| Solvent content [%]                                    | 43                         |
| <b>(B) Diffraction Data<sup>[a]</sup></b>              |                            |
| Resolution range [Å]                                   | 47.29 – 0.93 (0.99 – 0.93) |
| Unique reflections                                     | 181142 (19356)             |
| $R(I)_{sym}$ [%] <sup>[b]</sup>                        | 5.0 (45.8)                 |
| Completeness [%]                                       | 88.1 (58.3)                |
| Redundancy                                             | 4.5 (3.8)                  |
| $I/\sigma(I)$                                          | 15.7 (2.5)                 |
| <b>(C) Refinement</b>                                  |                            |
| Resolution range [Å]                                   | 39.69 – 0.93               |
| Reflections used in refinement                         |                            |
| work                                                   | 172084                     |
| free                                                   | 9058                       |
| Final R values                                         |                            |
| work [%] <sup>[c]</sup>                                | 10.9                       |
| free [%] <sup>[d]</sup>                                | 12.3                       |
| Number of protein residues                             | 316                        |
| NADP <sup>+</sup> atoms                                | 48                         |
| Inhibitor atoms                                        | 38                         |
| Water molecules                                        | 463                        |
| Other inhibitor atoms                                  | 13                         |
| RMSD bonds                                             |                            |
| Bond length [Å]                                        | 0.010                      |
| Bond angles [°]                                        | 1.22                       |
| Ramachandran plot <sup>[e]</sup>                       |                            |
| favored regions [%]                                    | 89.9                       |
| additional allowed reg. [%]                            | 10.1                       |
| generously allowed reg. [%]                            | 0.0                        |
| Mean <i>B</i> -Factor [Å <sup>2</sup> ] <sup>[f]</sup> |                            |
| Protein                                                | 9.9                        |
| Inhibitor                                              | 18.4                       |
| Water molecules                                        | 23.8                       |
| NADP <sup>+</sup>                                      | 6.8                        |
| Other inhibitors                                       | 10.4                       |

[a] values in parenthesis are statistics for the highest resolution shell. [b]  $R(I)_{sym} = \frac{\sum |I - \langle I \rangle|}{\sum |I|} \cdot 100$  for which *I* = observed intensity and  $\langle I \rangle$  = statistically weighted average intensity of multiple observations. [c] Calculated by MOLEMAN.<sup>1</sup> [d]  $R_{free}$  = same definition as for  $R_{work}$  for a cross validation set of  $\approx 5\%$  of the reflections. [e] Calculated by PROCHECK.<sup>2</sup> [f]  $R_{work} = \frac{\sum |F_o - F_c|}{\sum |F_o|} \cdot 100$  for which  $F_o$  = observed structure factor amplitudes and  $F_c$  = calculated structure factor amplitudes.

## Supplementary References

1. Kleywegt, G. J., Zou, J. Y., Kjeldgaard, M. & Jones, T. A. *International Tables for Crystallography Volume F: Crystallography of biological macromolecules*. (2001). doi:doi: 10.1107/97809553602060000106.
2. Laskowski, R. A., MacArthur, M. W. ., Moss, D. S. . & Thornton, J. M. M. J. PROCHECK: A program to check the stereochemical quality of protein structures. *J. Appl. Crystallogr.* **26**, 283–291, 1993.
